# Supplementary material
Source: Elsevier journal article supplement (https://www.sciencedirect.com/science/article/pii/S2341287921001046)
Supplement: mmc1 [file S2341287921001046:mmc1.pdf]

## Justificación de cambios

1. Se indicó en el título, resumen y en el apartado de material y métodos que el estudio se realizó en un hospital pediátrico de tercer nivel en Málaga (España).
2. Introducción:
  - a. Se añadió en la introducción (párrafo 3) la referencia bibliográfica 4 a la afirmación “En consonancia con ello, clásicamente, los pacientes con infección por VIH constituían el principal grupo de riesgo para padecer NPJ, presentando cuadros clínicos más graves y con peor pronóstico en comparación con el subgrupo de pacientes no VIH”.
  - b. Se modificó la frase del párrafo 4 “el diagnóstico etiológico de la NPJ en niños no es sencillo” por “el diagnóstico de la NPJ en niños suele basarse en criterios clínicos”.
2. Material y métodos:
  - a. Se detalló que se trata de un estudio observacional descriptivo retrospectivo.
  - b. Se aclaró el establecimiento de dos grupos de comparación en la muestra, pacientes con infección por VIH y pacientes no VIH.
  - c. Se remarcó que sólo se consideraron los casos en los que se confirmó el aislamiento microbiológico de *P.jirovecii*.
  - d. Se especificó que no se recogió consentimiento informado de los padres y/o tutores legales de los pacientes.
3. Resultados:
  - a. Se han presentado los resultados en forma de n/N (%) en los párrafos 1 y 8.
  - b. Se utilizaron la mediana y el rango intercuartílico para expresar la edad.
  - c. En el párrafo 3 no se reescribió la frase, al especificarse en material y métodos que se establecieron dos grupos de comparación, pacientes con VIH y pacientes no VIH.
  - d. Se ha redactado de nuevo el párrafo 4, referente a la profilaxis con TMP-SMX, para que la lectura resulte más sencilla.
  - e. Se ha redactado de nuevo el párrafo 8, referente al soporte ventilatorio en UCIP, para facilitar su comprensión.
  - f. Se especificó en el párrafo 9 que la ausencia de significación estadística respecto a la mortalidad se refería a diferencias de mortalidad entre pacientes VIH y pacientes no VIH.
4. Discusión:
  - a. Se ha destacado en la discusión, en párrafos del 3 al 6, que las comparaciones entre grupos no son valorables.

- b. Se añadieron en el antepenúltimo párrafo las referencias bibliográficas recomendadas por el revisor.

5. Tablas:

- a. Se expresaron los datos referentes a la edad en forma de mediana y rango intercuartílico.

6. Sugerencias no incluidas:

Como señala uno de los revisores, dada la probable infraestimación de la incidencia de esta patología al seleccionar como casos exclusivamente aquellos en los que existió confirmación microbiológica, sería muy interesante conocer cuántos pacientes se diagnosticaron de neumonía por *P.jirovecii* en base a criterios epidemiológicos, clínicos y analíticos durante el mismo periodo de tiempo. Lamentablemente, no disponemos de estos datos, pues el periodo de estudio incluye un amplio margen de tiempo en el que nuestro centro registraba exclusivamente los diagnósticos confirmados microbiológicamente, no siendo posible conocer cuántos pacientes fueron considerados como sospechosos de padecer la enfermedad. Por este motivo no hemos podido incluir en el texto este dato, a pesar de considerar que sería de gran interés.
